# Supplementary material
Source: bioRxiv or medRxiv preprint supplement (https://medrxiv.org/highwire/filestream/91970/field_highwire_adjunct_files/0/2020.08.01.20160077-1.pdf)
Supplement: Supplementary file [file 2020.08.01.20160077-1.pdf]

## Supplement

### **Impact of COVID-19 mitigation measures on the incidence of preterm birth: a national quasi-experimental study**

Jasper V Been, Lizbeth Burgos Ochoa, Loes CM Bertens, Sam Schoenmakers, Eric AP Steegers, Irwin KM Reiss

# Assignment variable frequency

Cut-offs at 09-03-2020, 15-03-2020, and 23-03-2020

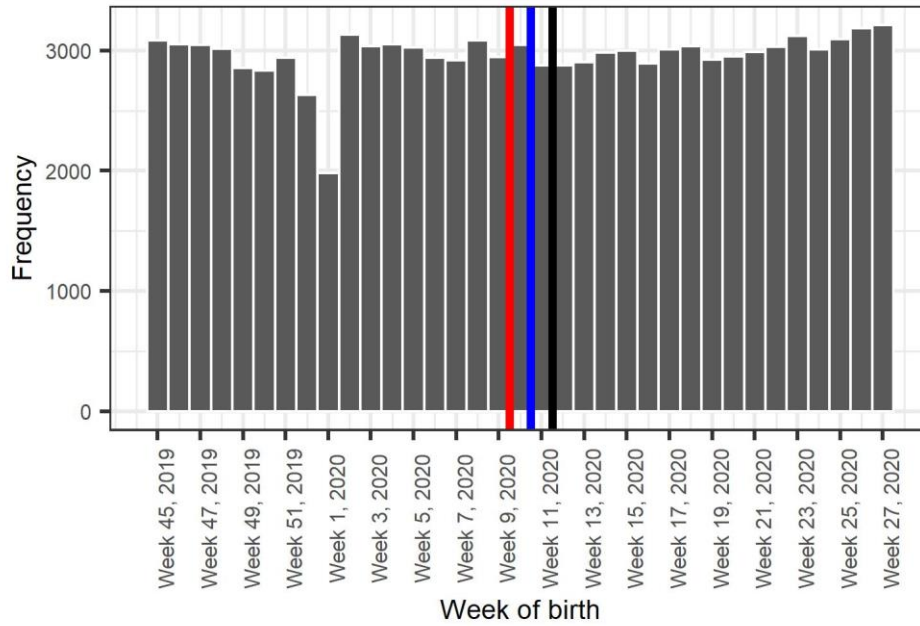

**SUPPLEMENTAL FIGURE 1. HISTOGRAM OF ASSIGNMENT VARIABLE, DEMONSTRATING THAT WEEK OF BIRTH IS CONTINUOUS NEAR CUT-OFF VALUES AND NOT AFFECTED BY THE COVID-19 MITIGATION MEASURES**

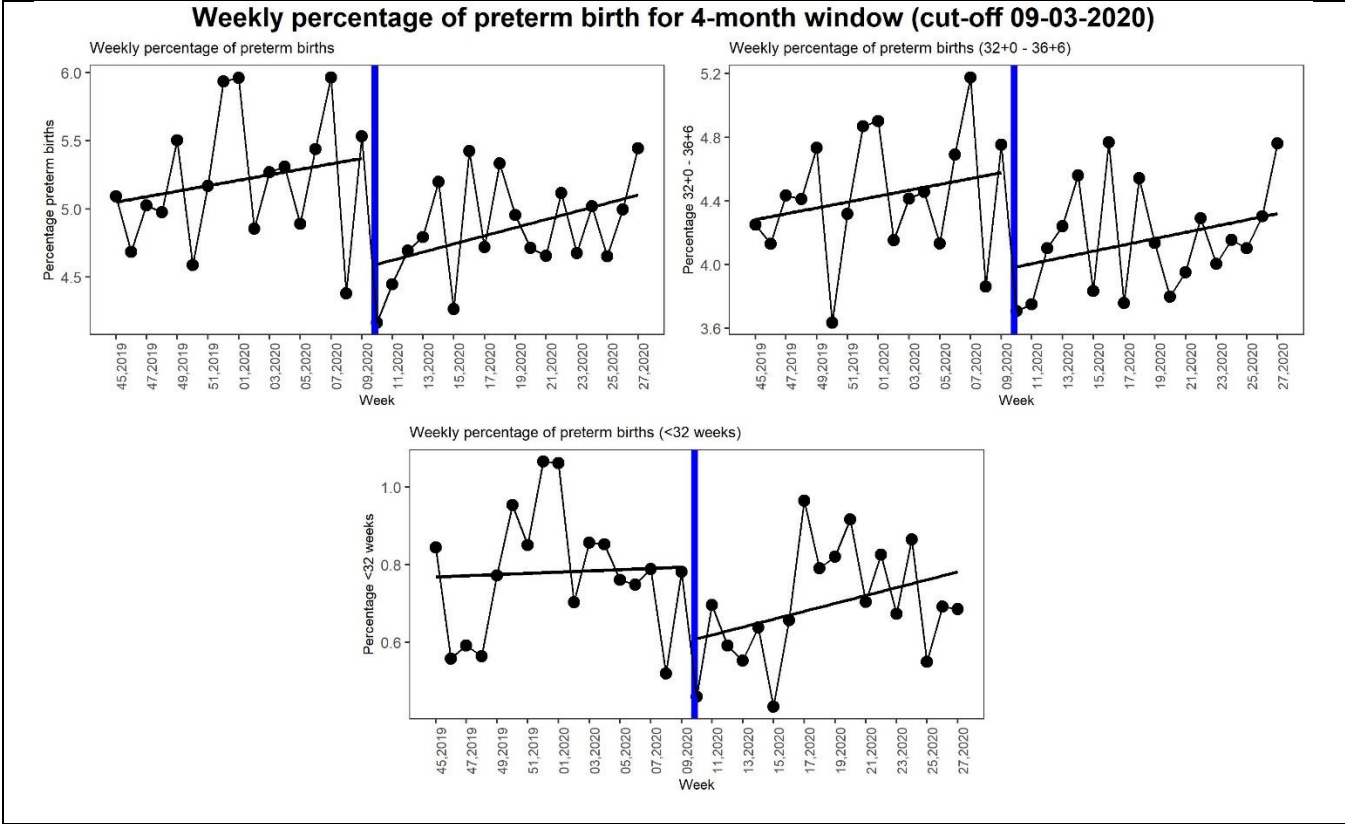

**SUPPLEMENTAL FIGURE 2. WEEKLY PERCENTAGE OF PRETERM BIRTH FOR 4-MONTH WINDOW PLOTTED AGAINST ASSIGNMENT VARIABLE (WEEK OF BIRTH) TO SHOW DISCONTINUITY AT CUT-OFF VALUE (09-03-2020)**

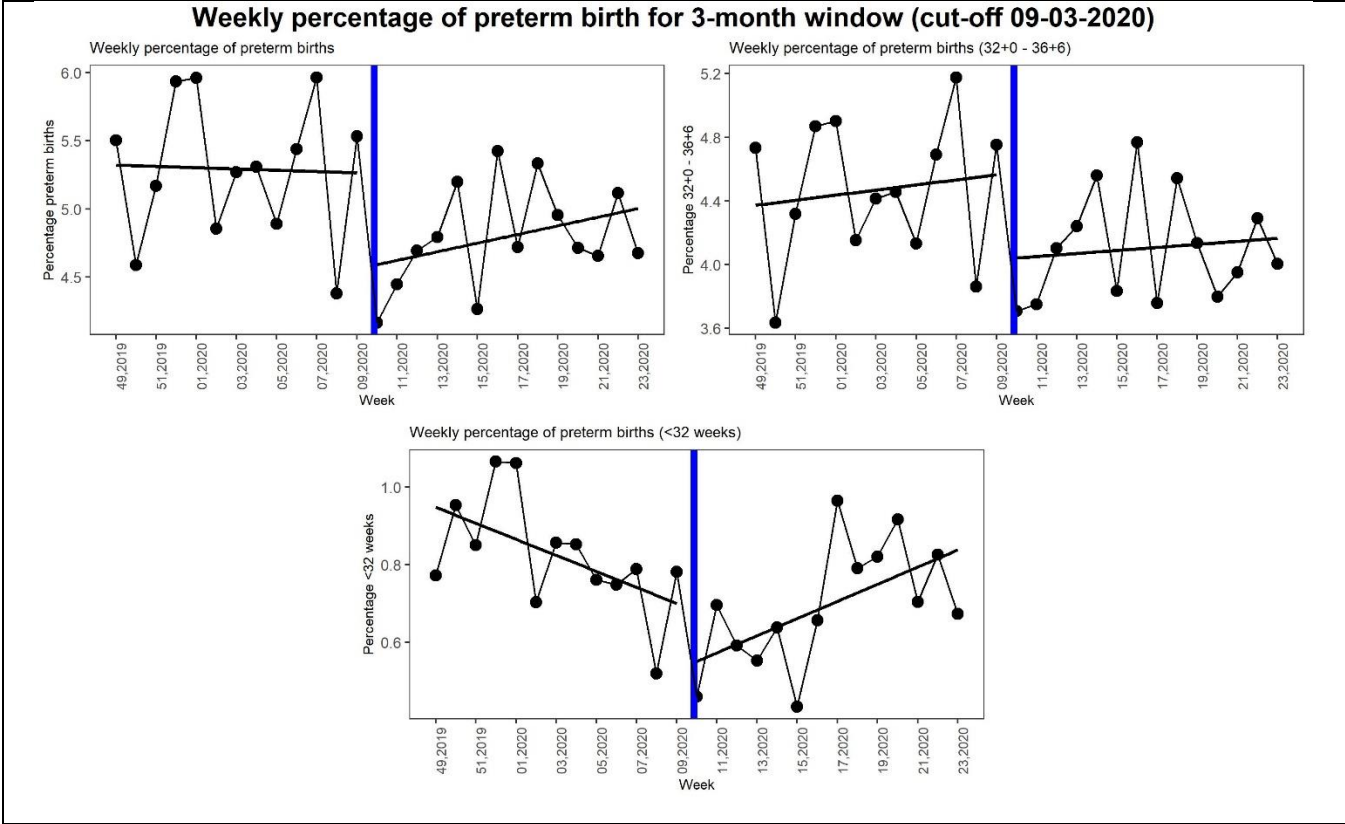

**SUPPLEMENTAL FIGURE 3. WEEKLY PERCENTAGE OF PRETERM BIRTH FOR 3-MONTH WINDOW PLOTTED AGAINST ASSIGNMENT VARIABLE (WEEK OF BIRTH) TO SHOW DISCONTINUITY AT CUT-OFF VALUE (09-03-2020)**

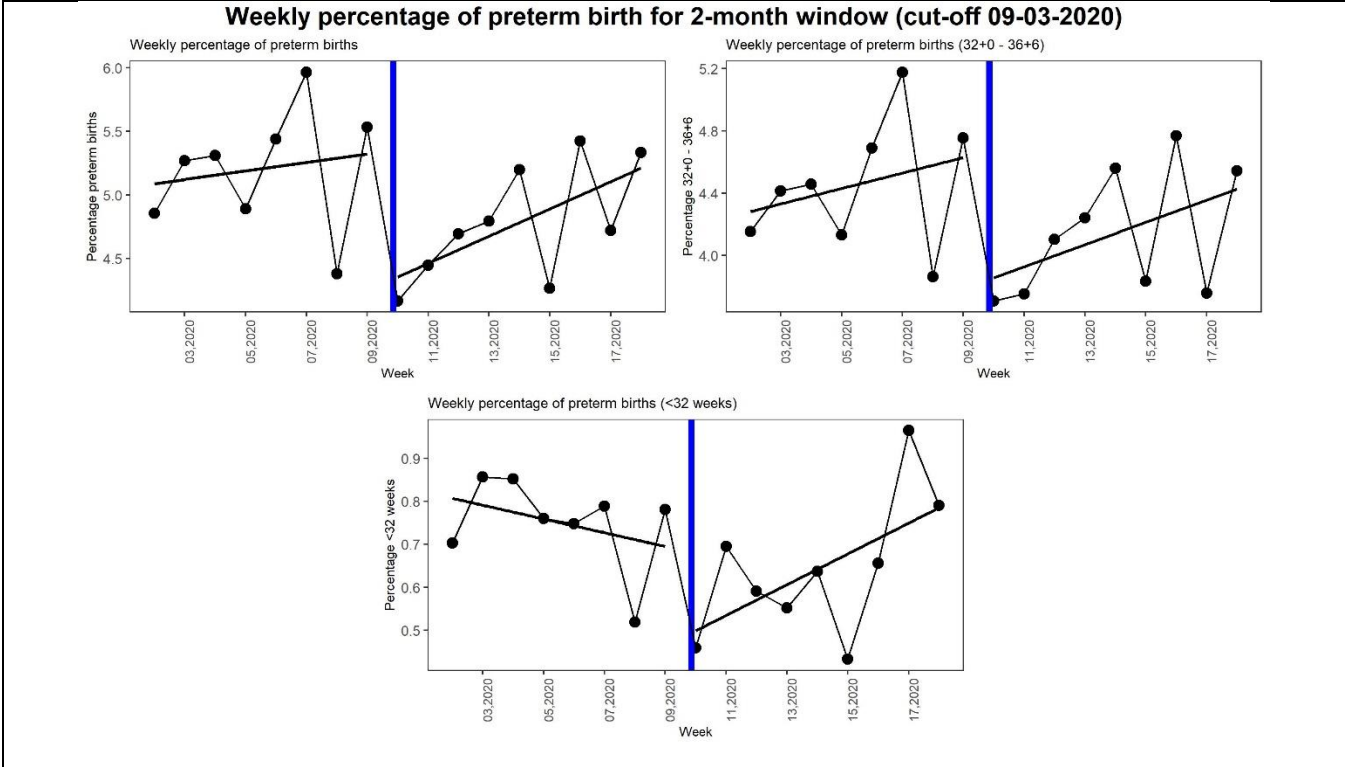

**SUPPLEMENTAL FIGURE 4. WEEKLY PERCENTAGE OF PRETERM BIRTH FOR 2-MONTH WINDOW PLOTTED AGAINST ASSIGNMENT VARIABLE (WEEK OF BIRTH) TO SHOW DISCONTINUITY AT CUT-OFF VALUE (09-03-2020)**

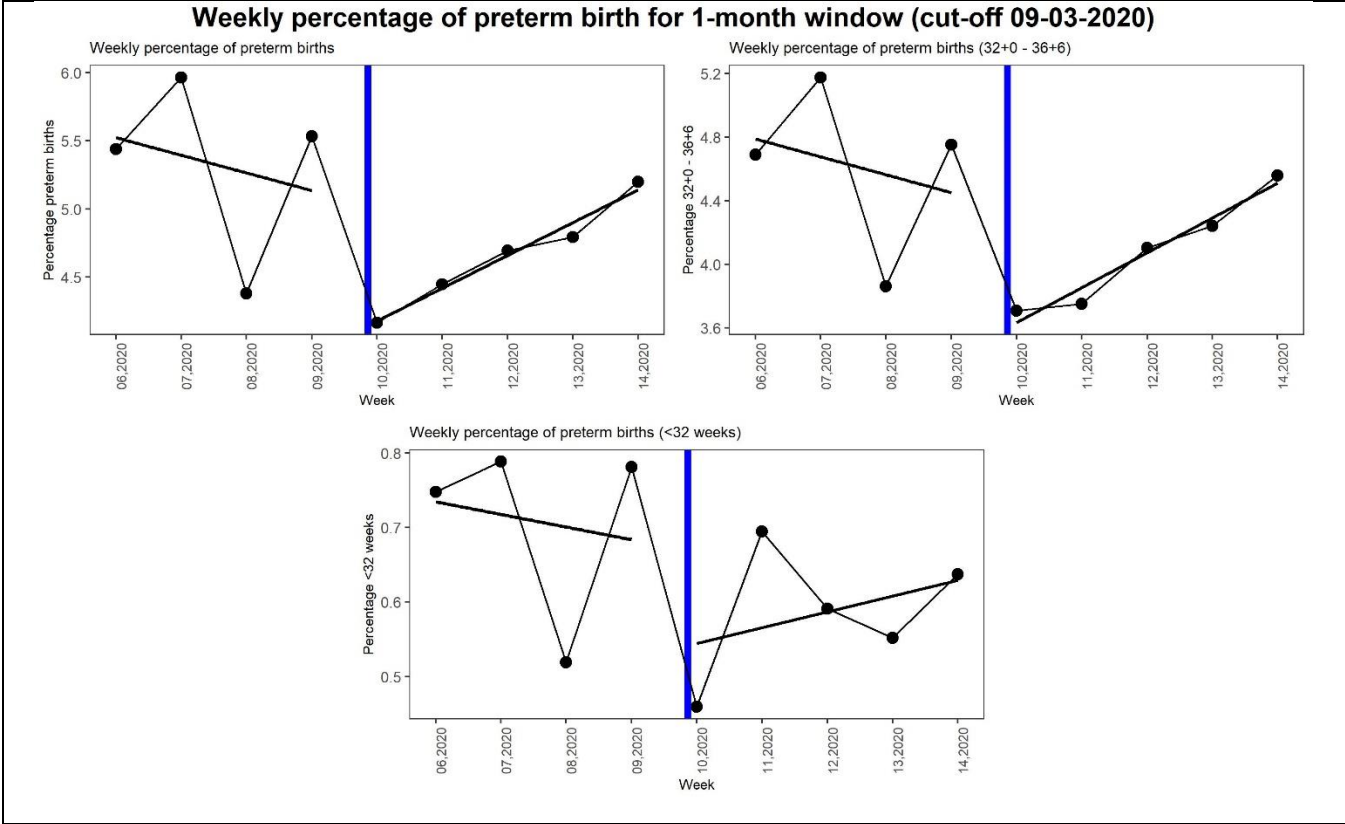

**SUPPLEMENTAL FIGURE 5. WEEKLY PERCENTAGE OF PRETERM BIRTH FOR 1-MONTH WINDOW PLOTTED AGAINST ASSIGNMENT VARIABLE (WEEK OF BIRTH) TO SHOW DISCONTINUITY AT CUT-OFF VALUE (09-03-2020)**

**Weekly percentage of preterm birth for 4-month window (cut-off 15-03-2020)**

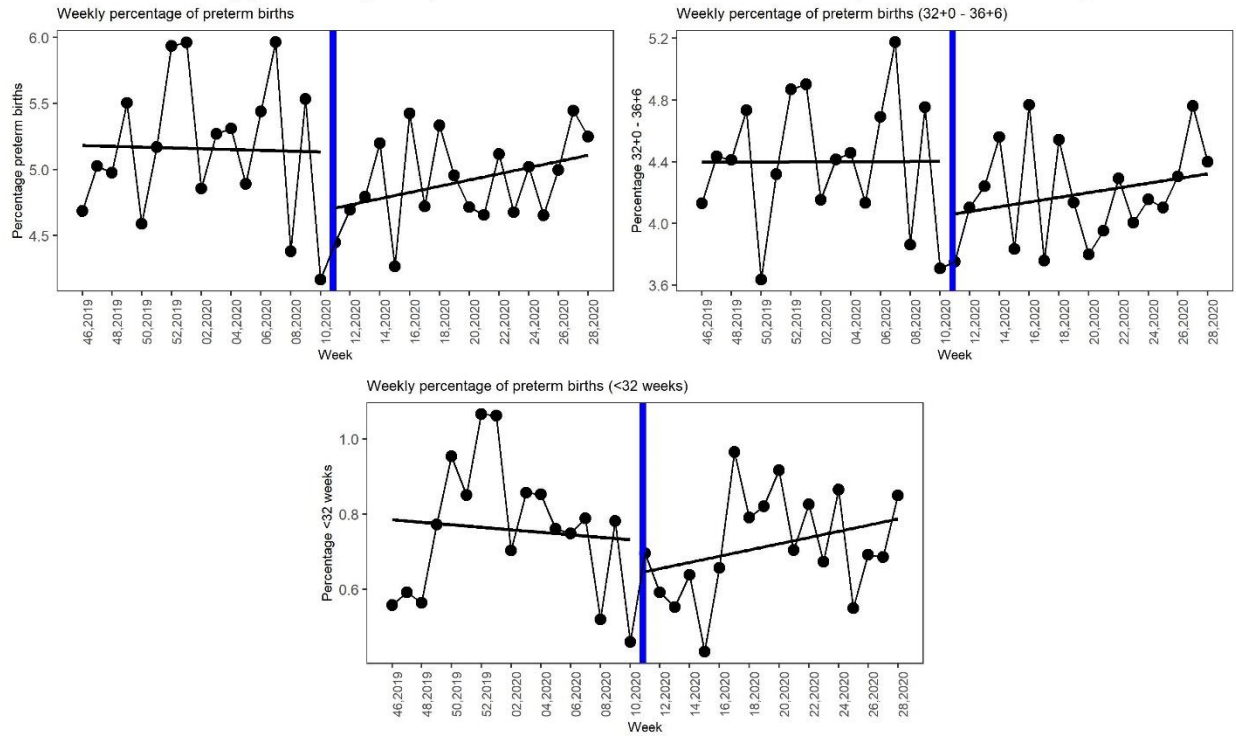

**SUPPLEMENTAL FIGURE 6. WEEKLY PERCENTAGE OF PRETERM BIRTH FOR 4-MONTH WINDOW PLOTTED AGAINST ASSIGNMENT VARIABLE (WEEK OF BIRTH) TO SHOW DISCONTINUITY AT CUT-OFF VALUE (15-03-2020)**

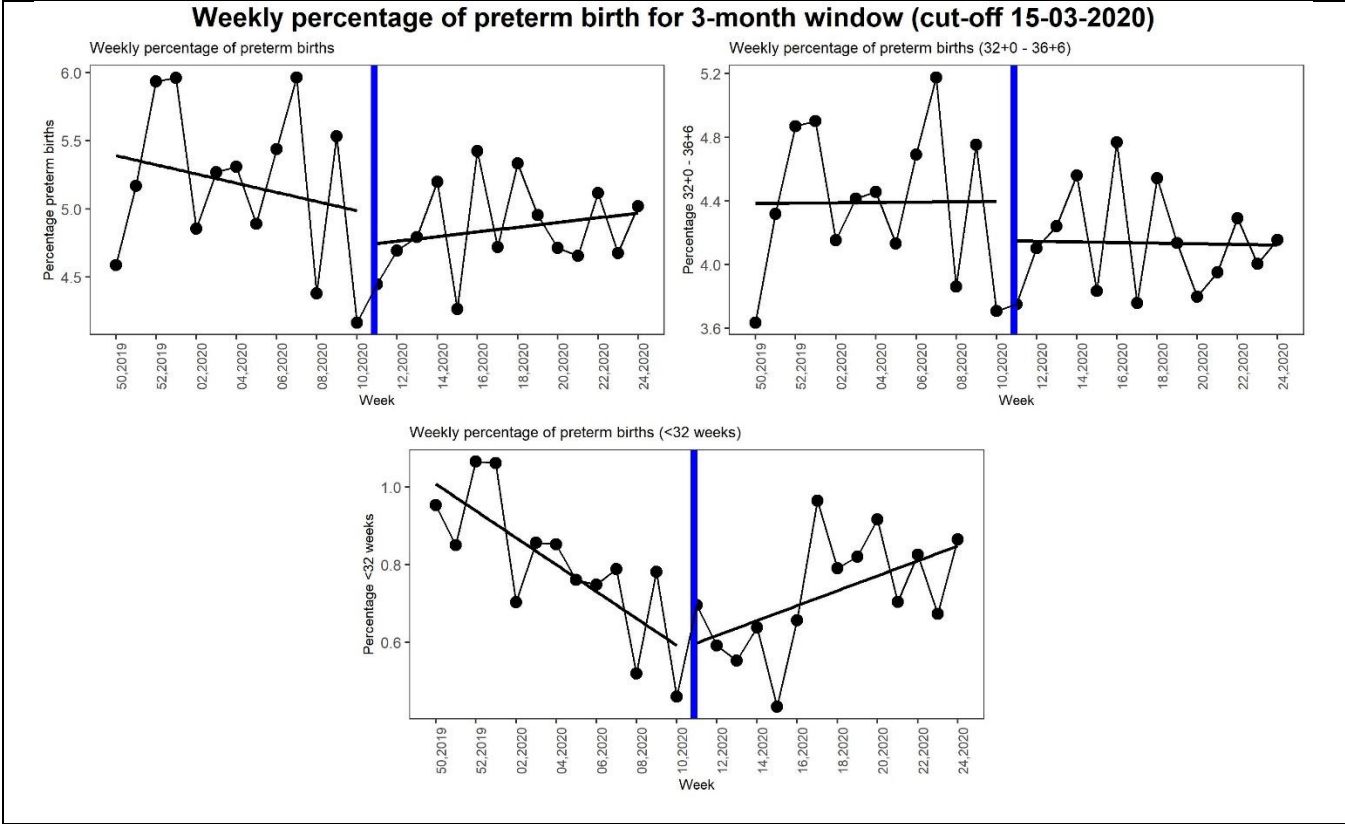

**SUPPLEMENTAL FIGURE 7. WEEKLY PERCENTAGE OF PRETERM BIRTH FOR 3-MONTH WINDOW PLOTTED AGAINST ASSIGNMENT VARIABLE (WEEK OF BIRTH) TO SHOW DISCONTINUITY AT CUT-OFF VALUE (15-03-2020)**



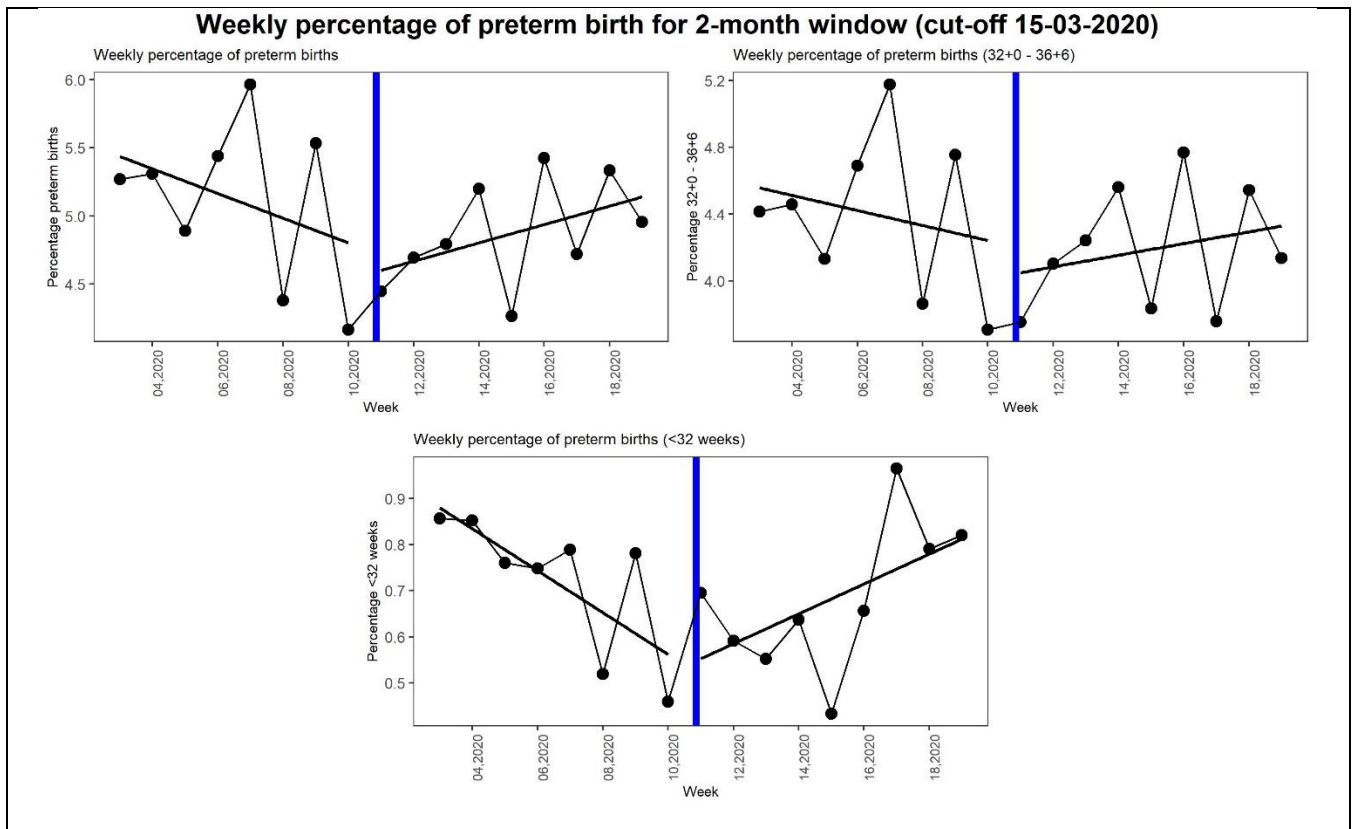

**SUPPLEMENTAL FIGURE 8. WEEKLY PERCENTAGE OF PRETERM BIRTH FOR 2-MONTH WINDOW PLOTTED AGAINST ASSIGNMENT VARIABLE (WEEK OF BIRTH) TO SHOW DISCONTINUITY AT CUT-OFF VALUE (15-03-2020)**

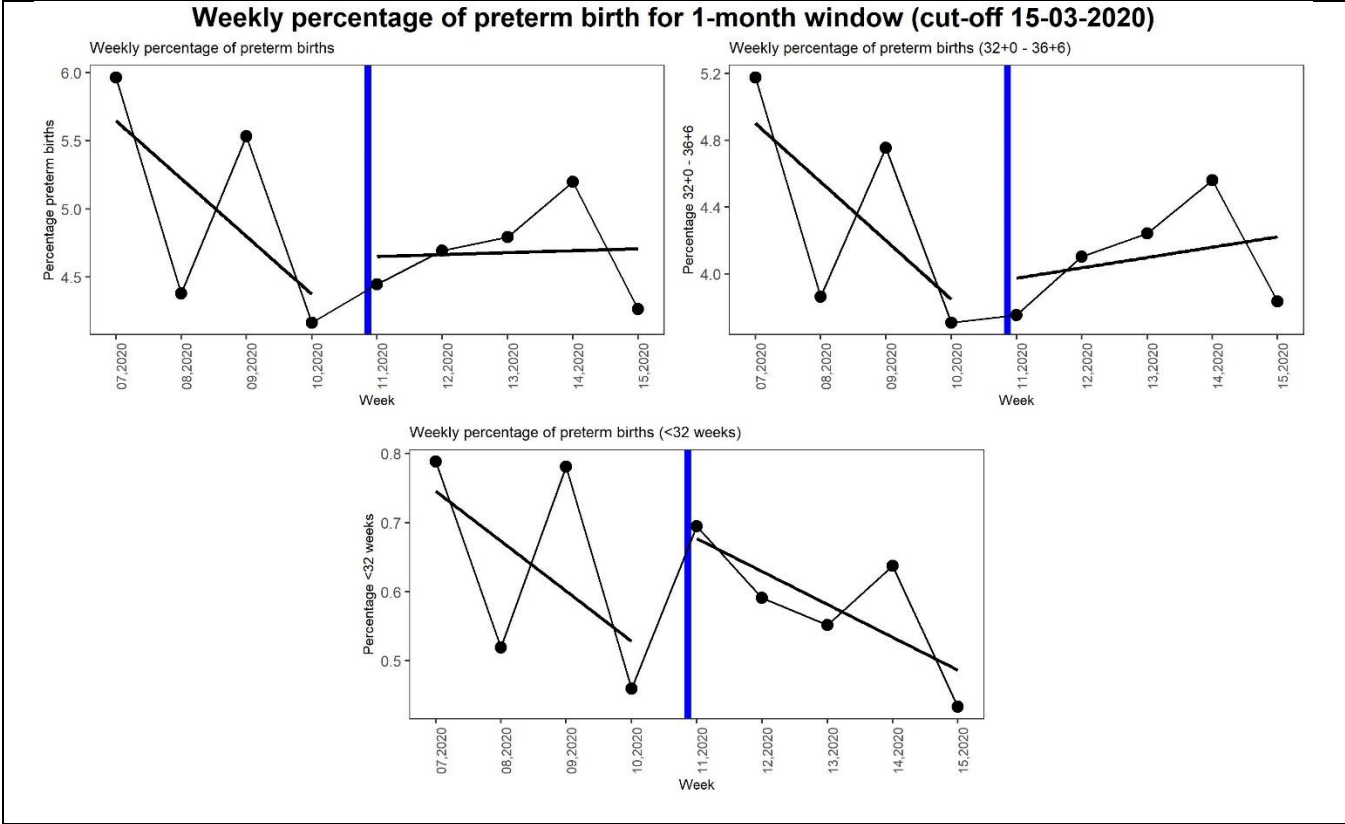

**SUPPLEMENTAL FIGURE 9. WEEKLY PERCENTAGE OF PRETERM BIRTH FOR 1-MONTH WINDOW PLOTTED AGAINST ASSIGNMENT VARIABLE (WEEK OF BIRTH) TO SHOW DISCONTINUITY AT CUT-OFF VALUE (15-03-2020)**

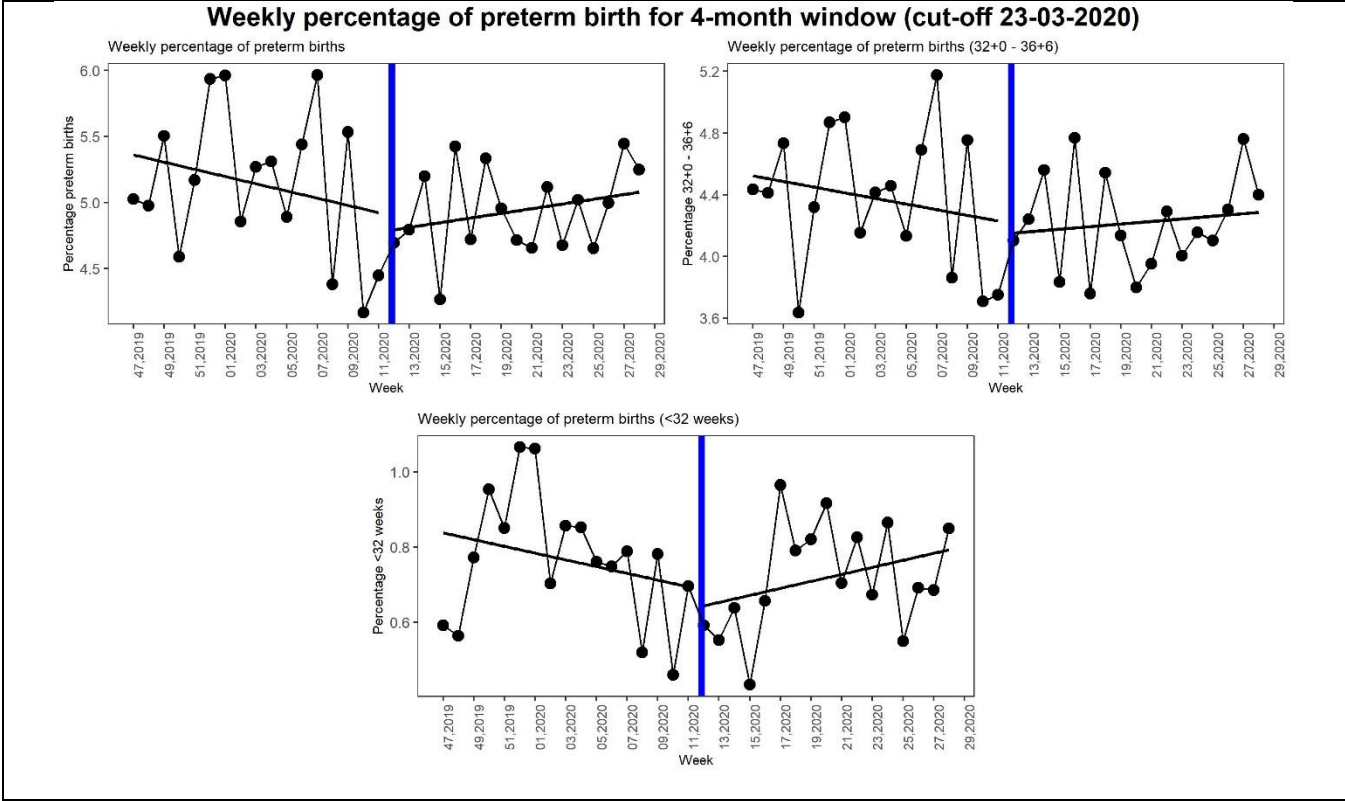

**SUPPLEMENTAL FIGURE 10. WEEKLY PERCENTAGE OF PRETERM BIRTH FOR 4-MONTH WINDOW PLOTTED AGAINST ASSIGNMENT VARIABLE (WEEK OF BIRTH) TO SHOW DISCONTINUITY AT CUT-OFF VALUE (23-03-2020)**

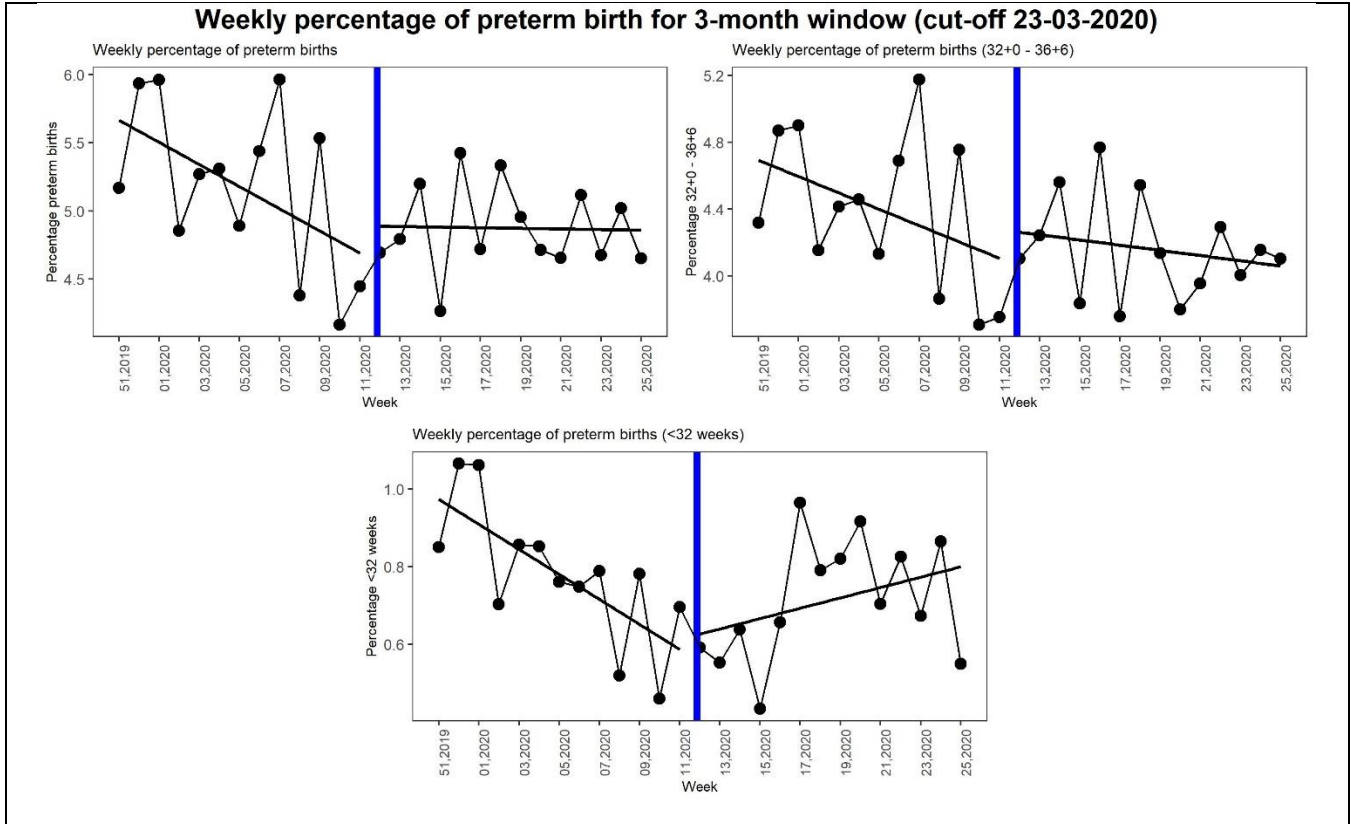

**SUPPLEMENTAL FIGURE 11. WEEKLY PERCENTAGE OF PRETERM BIRTH FOR 3-MONTH WINDOW PLOTTED AGAINST ASSIGNMENT VARIABLE (WEEK OF BIRTH) TO SHOW DISCONTINUITY AT CUT-OFF VALUE (23-03-2020)**

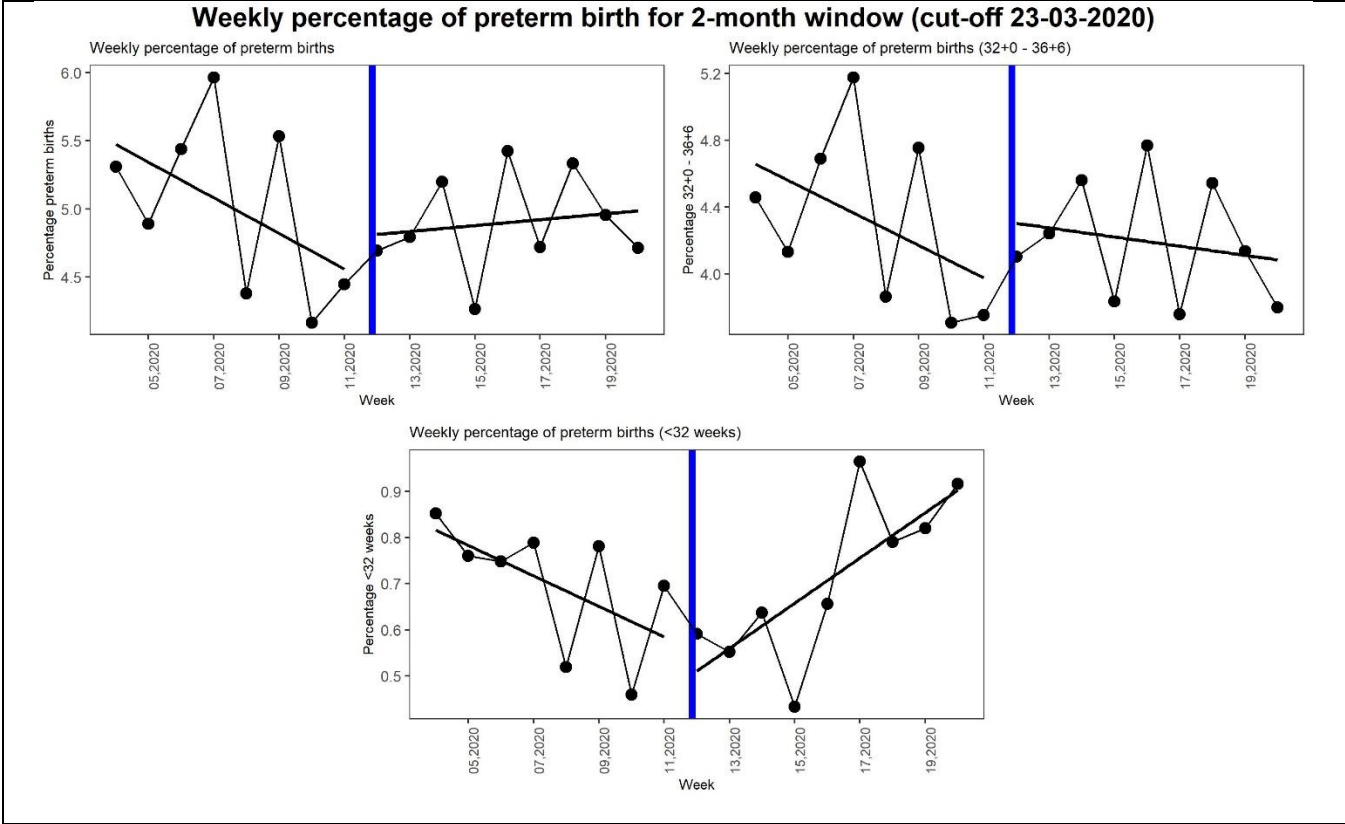

**SUPPLEMENTAL FIGURE 12. WEEKLY PERCENTAGE OF PRETERM BIRTH FOR 2-MONTH WINDOW PLOTTED AGAINST ASSIGNMENT VARIABLE (WEEK OF BIRTH) TO SHOW DISCONTINUITY AT CUT-OFF VALUE (23-03-2020)**

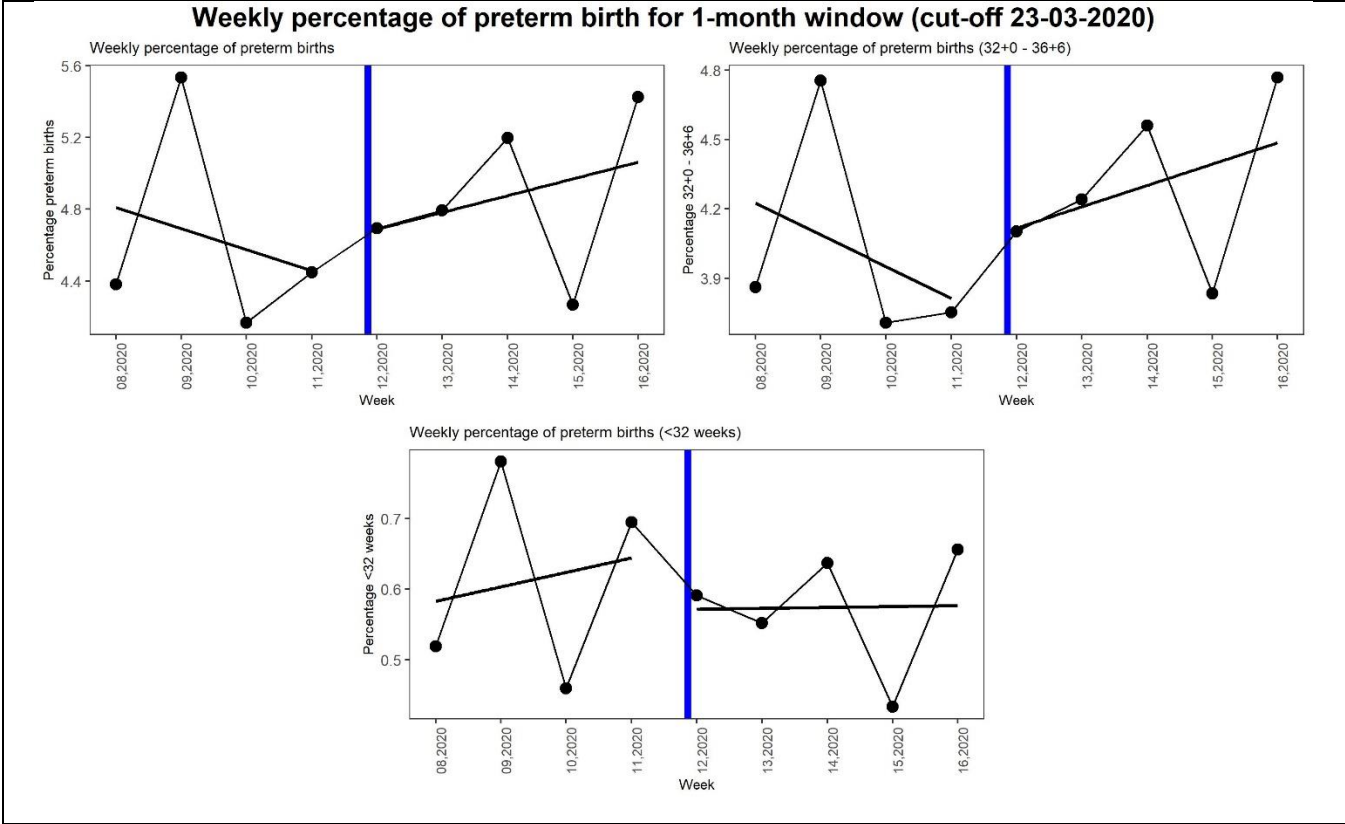

**SUPPLEMENTAL FIGURE 13. WEEKLY PERCENTAGE OF PRETERM BIRTH FOR 1-MONTH WINDOW PLOTTED AGAINST ASSIGNMENT VARIABLE (WEEK OF BIRTH) TO SHOW DISCONTINUITY AT CUT-OFF VALUE (23-03-2020)**

**SUPPLEMENTAL TABLE 1: VALIDATION OF ANNUAL POPULATION CHARACTERISTICS AGAINST PERINED FOR SELECTED YEARS**

| Characteristic (n(%))           | 2011              |                   | 2014              |                   | 2017              |                   |
|---------------------------------|-------------------|-------------------|-------------------|-------------------|-------------------|-------------------|
|                                 | Praeventis        | Perined           | Praeventis        | Perined           | Praeventis        | Perined           |
| <b>Gestational age</b>          | <b>n=173,965</b>  | <b>n=172,453</b>  | <b>n=169,375</b>  | <b>n=169,225</b>  | <b>n=164,478</b>  | <b>n=160,818</b>  |
| 24+0 – 31+6 weeks               | 1,223 (0.7)       | 1,512 (0.9)       | 1,236 (0.7)       | 1,515 (0.9)       | 1,139 (0.7)       | 1,345 (0.8)       |
| 32+0 – 36+6 weeks               | 8,081 (4.6)       | 8,221 (4.8)       | 7,772 (4.6)       | 7,883 (4.7)       | 7,218 (4.4)       | 7,363 (4.6)       |
| 37+0 – 41+6 weeks               | 161,070<br>(92.6) | 157,565<br>(91.4) | 157,523<br>(93.0) | 154,998<br>(91.6) | 153,196<br>(93.1) | 149,493<br>(93.0) |
| ≥42+0 weeks                     | 3,107 (1.8)       | 3,022 (1.8)       | 2,285 (1.3)       | 2,213 (1.3)       | 2,287 (1.4)       | 2,316 (1.4)       |
| missing                         | 484 (0.3)         | 2,115 (1.2)       | 559 (0.3)         | 2,646 (1.6)       | 638 (0.4)         | 301 (0.2)         |
| <b>Birth weight<sup>a</sup></b> | <b>n=173,965</b>  | <b>n=172,886</b>  | <b>n=169,375</b>  | <b>n=169,673</b>  | <b>n=164,478</b>  | <b>n=161,232</b>  |
| <1500 grams                     | 1,054 (0.6)       | 1,801 (1.1)       | 1,079 (0.6)       | 1,812 (1.0)       | 1,059 (0.6)       | 1,525 (1.0)       |
| 1500 – 2499 grams               | 6,299 (3.6)       | 6,613 (3.8)       | 6,462 (3.8)       | 6,787 (4.0)       | 5,918 (3.6)       | 5,993 (3.7)       |
| 2500 – 3499 grams               | 82,177 (47.2)     | 81,569 (47.2)     | 82,303 (48.6)     | 82,434 (48.6)     | 79,130 (48.1)     | 77,552 (48.1)     |
| 3500 – 3999 grams               | 58,131 (33.5)     | 57,252 (33.1)     | 55,803 (32.9)     | 55,267 (32.6)     | 55,247 (33.6)     | 53,837 (33.4)     |
| 4000 – 4499 grams               | 21,551 (12.4)     | 21,167 (12.2)     | 19,986 (11.8)     | 19,845 (11.7)     | 19,400 (11.8)     | 18,939 (11.7)     |
| ≥4500 grams                     | 4,134 (2.4)       | 4,099 (2.4)       | 3,229 (1.9)       | 3,228 (1.9)       | 3,116 (1.9)       | 3,051 (1.9)       |
| missing                         | 437 (0.3)         | 385 (0.2)         | 513 (0.3)         | 300 (0.2)         | 608 (0.4)         | 335 (0.2)         |

Only singleton births at gestational ages ≥24+0 weeks are included in the comparisons; note that Perined data also includes stillbirths. <sup>a</sup>For Perined the birth weight distribution includes births at gestational ages ≥22+0 weeks instead of ≥24+0 weeks.

**SUPPLEMENTAL TABLE 1: IMPACT OF THE 9 MARCH COVID-19 MITIGATION MEASURES ON THE INCIDENCE OF PRETERM BIRTH: EFFECT MODIFICATION BY NEIGHBOURHOOD SOCIO-ECONOMIC STATUS**

| Variable                                     | Time window around implementation |                  |                  |                  |
|----------------------------------------------|-----------------------------------|------------------|------------------|------------------|
|                                              | ±1 month                          | ±2 months        | ±3 months        | ±4 months        |
| <b>COVID-19 measures</b>                     | 0.74 (0.55–0.99)                  | 0.74 (0.60–0.91) | 0.85 (0.71–1.01) | 0.87 (0.73–1.02) |
| <b>SES</b>                                   |                                   |                  |                  |                  |
| High SES                                     | REF                               | REF              | REF              | REF              |
| Medium SES                                   | 1.10 (1.05–1.15)                  | 1.13 (1.09–1.16) | 1.11 (1.08–1.14) | 1.12 (1.09–1.14) |
| Low SES                                      | 1.08 (1.02–1.14)                  | 1.11 (1.07–1.16) | 1.10 (1.06–1.13) | 1.12 (1.08–1.15) |
| <b>COVID-19 measures × SES (interaction)</b> |                                   |                  |                  |                  |
| High SES                                     | REF                               | REF              | REF              | REF              |
| Medium SES                                   | 1.16 (0.94–1.44)                  | 1.07 (0.91–1.25) | 1.01 (0.89–1.13) | 0.98 (0.88–1.09) |
| Low SES                                      | 1.17 (0.90–1.52)                  | 1.12 (0.92–1.35) | 1.01 (0.87–1.18) | 0.99 (0.87–1.13) |

SES = socioeconomic status; REF = reference category



**SUPPLEMENTAL TABLE 3: IMPACT OF THE 9 MARCH COVID-19 MITIGATION MEASURES ON THE INCIDENCE OF PRETERM BIRTH: CENSORING OF ONE OR TWO WEEKS PRIOR TO OR FOLLOWING THE MEASURES**

| Period of censoring                       | Time window around implementation |                  |                  |                  |
|-------------------------------------------|-----------------------------------|------------------|------------------|------------------|
|                                           | ±1 month                          | ±2 months        | ±3 months        | ±4 months        |
| <b>Two weeks prior to implementation</b>  | 1.10 (0.71–1.70)                  | 0.79 (0.63–0.99) | 0.89 (0.73–1.07) | 0.89 (0.74–1.07) |
| <b>One week prior to implementation</b>   | 0.83 (0.62–1.12)                  | 0.80 (0.66–0.96) | 0.88 (0.75–1.03) | 0.87 (0.75–1.01) |
| <b>One week following implementation</b>  | 0.83 (0.64–1.07)                  | 0.78 (0.65–0.93) | 0.86 (0.73–1.00) | 0.86 (0.74–0.99) |
| <b>Two weeks following implementation</b> | 0.82 (0.63–1.07)                  | 0.77 (0.64–0.93) | 0.86 (0.73–1.01) | 0.86 (0.73–1.00) |

SES = socioeconomic status; REF = reference category
